# Supplementary material for: Nurse career mapping: a qualitative case study of a new hospital
Source: PubMed Central journal article supplement (PMC6696660; doi:10.1186/s12912-019-0353-z), 2019-08-16
Supplement: 12912_2019_353_MOESM1_ESM.pdf [file 12912_2019_353_MOESM1_ESM.pdf]

Figure 1. Career Stage Mapping Flow in Hospital X

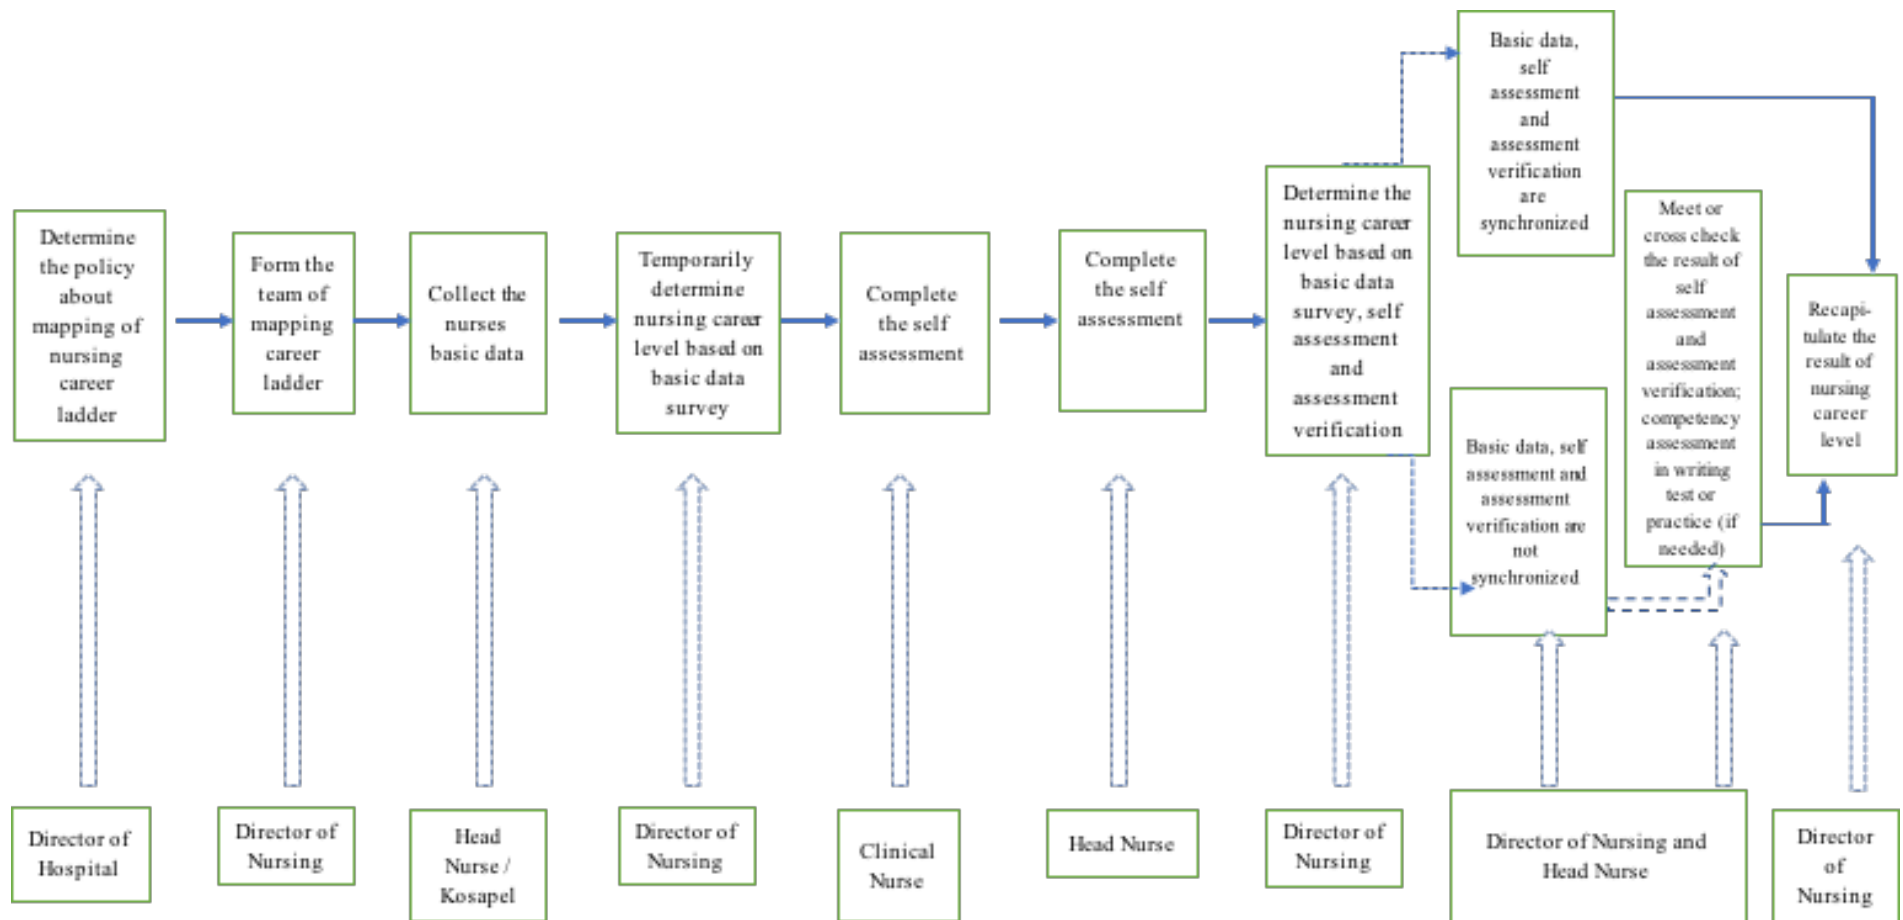

**Figure 2. Nurses' Career Level in Hospital X**

|         |                                                                                                                                                                                                      |                                     |                         |
|---------|------------------------------------------------------------------------------------------------------------------------------------------------------------------------------------------------------|-------------------------------------|-------------------------|
| PK IIIC | <ul style="list-style-type: none"> <li>Specialist Nurse + min. 6 years work experience</li> <li>Ns + min. 15 years work experience</li> <li>Nurse Diploma + min. 17 years work experience</li> </ul> | PK IIIC: 90% of Total Competencies* | 391 Total Competencies* |
| PK IIIB | <ul style="list-style-type: none"> <li>Specialist Nurse + min. 3 years work experience</li> <li>Ns + min. 12 years work experience</li> <li>Nurse Diploma + min. 14 years work experience</li> </ul> | PK IIIB: 70% of Total Competencies* |                         |
| PK IIIA | <ul style="list-style-type: none"> <li>Specialist Ns + 0 year experience</li> <li>Ns + min. 9 years work experience</li> <li>Nurse Diploma + min. 11 years work experience</li> </ul>                | PK IIIA: 50% of Total Competencies* |                         |
| PK IIB  | <ul style="list-style-type: none"> <li>Ns + min. 6 years work experience</li> <li>Nurse Diploma + min. 8 years work experience</li> </ul>                                                            | PK IIB: 80% of Total Competencies*  | 292 Total Competencies* |
| PK IIA  | <ul style="list-style-type: none"> <li>Ns + min. 3 years work experience</li> <li>Nurse Diploma + min. 5 years experience</li> </ul>                                                                 | PK IIA: 60% of Total Competencies*  |                         |
| PK IB   | <ul style="list-style-type: none"> <li>Ns + 0 year experience min.</li> <li>Nurse Diploma+ min. 2 years experience</li> </ul>                                                                        | PK IB: 80% of Total Competencies*   | 162 Total Competencies* |
| PK IA   | <ul style="list-style-type: none"> <li>Nurse Diploma + 0 years experience</li> </ul>                                                                                                                 | PK IA: 60% of Total Competencies*   |                         |

Notes:  
 \* = Amendable amount of competencies based on ward conditions, if it has not been done or irrelevant based on ward conditions, then the competencies uncountable and given a code (T)
